# Supplementary material for: Visuomotor Adaptation in Early Stage Modulates Brain Network and Activity in Frontal Regions
Source: Research Square preprint supplement (doi:10.21203/rs.3.rs-6653321/v1), 2025-06-18
Supplement: Supplementary file 1 [file 8010fe86acc1ff2a2889e335.pdf]

## Supplementary information for

### Visuomotor Adaptation in Early Stage Modulates Brain Network and Activity in Frontal regions

Saki Niiyama, Rie Yoshida, Megumi Miyashita, and Toshiyuki Kondo

To determine the appropriate time window (TW) for brain activity analysis, we obtained the variation in brain activity at each candidate TW with a time width of 40 s, between the pre-test and the post-test, then compared the  $p$  value using the Wilcoxon signed-rank test. Fig. S1.B represents the transition of the  $p$  value in each candidate TW. In TW: 30-70 s, the most number of channels (L7, R3, and R5) that showed significant changes between pre-test and post-test were confirmed. We also examined the time-series of the total average measured oxy-Hb (Fig. S1.A). In principle, the HRF model indicates that brain activity is the plateau in TW: 20-60 s, which is the middle of the short task period. However, the observed plateau was later than the HRF model. Based on the evidence, we used 30-70 s TW for the analysis.

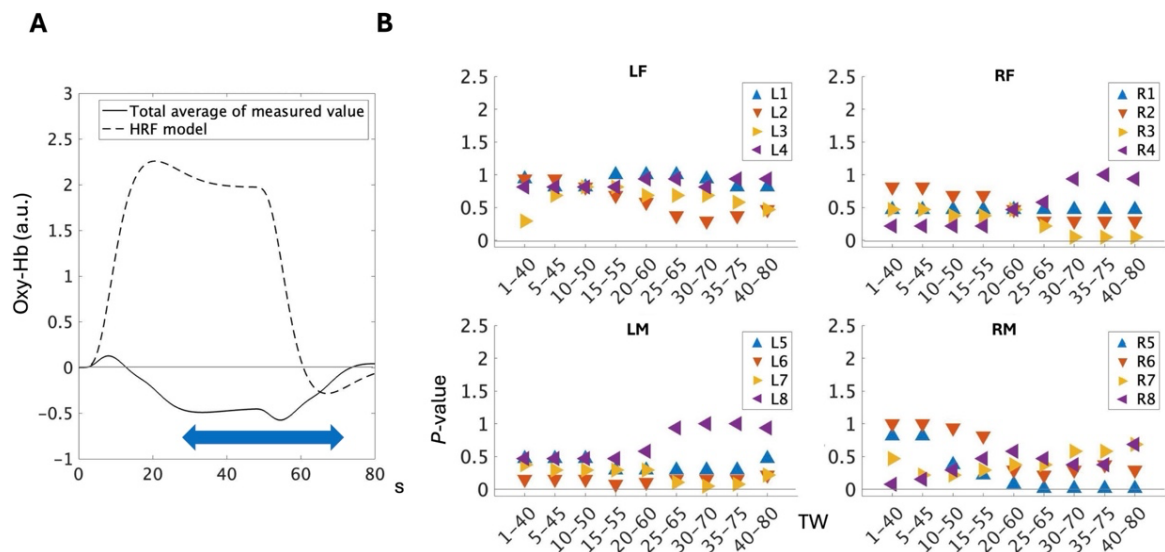

**Figure S1.** Pre-analyses for determining the appropriate TW used to calculate brain activity amount. A: Time-series graphs of measured oxy-Hb and HRF model. B: Transition of  $p$  value using the Wilcoxon signed-rank test in each TW. Each Colored triangle represents channels of NIRS measurement.
